# Supplementary material for: p53 mediates PEDF-induced autophagy in human umbilical vein endothelial cells through sestrin2 signaling
Source: PubMed Central journal article supplement — Mol Med Rep. 2019 Jun 3;20(2):1443–50. doi: 10.3892/mmr.2019.10319 (PMC6625384; doi:10.3892/mmr.2019.10319), 2019-06-03

Figure S1. GFP-LC3 plasmid transfection efficiency in human umbilical vein endothelial cells. GFP cell staining was visible in the GFP-LC3-transfected group but not in the control group. GFP, green fluorescent protein; LC3, microtubule-associated protein light chain 3.

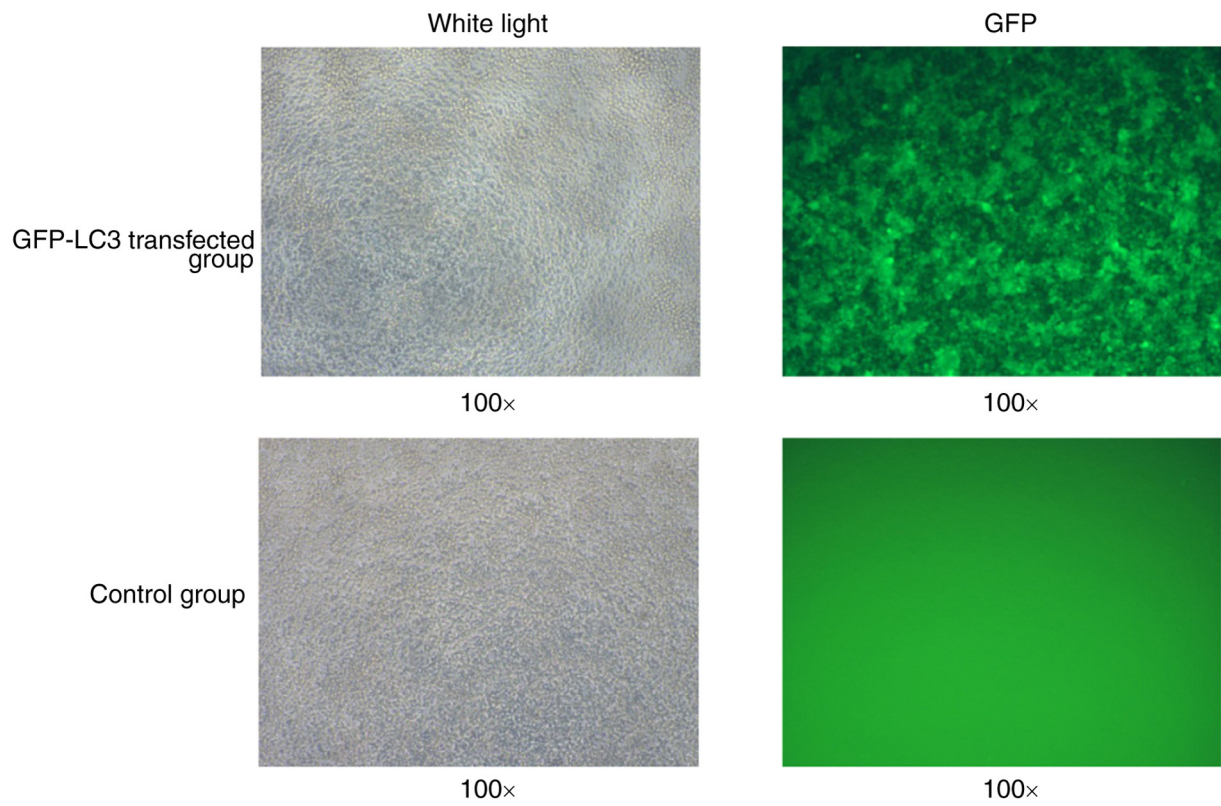

Supplement: Supplementary_Data.pdf [file Supplementary_Data.pdf]
